# Supplementary material for: The Repeat Sequences and Elevated Substitution Rates of the Chloroplast accD Gene in Cupressophytes
Source: Front Plant Sci. 2018 Apr 20;9:533. doi: 10.3389/fpls.2018.00533 (PMC5920036; doi:10.3389/fpls.2018.00533)
Supplement: Supplementary file 2 [file Table_2.XLSX]

## Sheet: Repeat element information
Repeat	Consensus amino acid sequence	Size (amino acid)	Family	Genus	Species
R1	FIEEGVSQLDKL(I)IRSN	16	Cephalotaxaceae	Cephalotaxus	C. sinensis(2), C. hainanensis (2), C. wilsoniana (2), C. oliveri (2) C.fortune(2)
R2	EPKDSDIQE	9	Cephalotaxaceae	Cephalotaxus	C. sinensis(2), C. hainanensis(2), C. wilsoniana (2), C. oliveri (2) C.fortune(2)
R3	SDIEED	6	Cephalotaxaceae	Cephalotaxus	C.sinensis (12), C. hainanensis (13), C. wilsoniana(12), C. oliveri(6) C.fortune(12)
R4	SD(Y)IESF	6	Cephalotaxaceae	Cephalotaxus	C. sinensis (5),C. hainanensis (3), C. wilsoniana (4), C. oliveri(2), C.fortune(5)
R5	SD(Y)IEEF	6	Cephalotaxaceae	Cephalotaxus	C. wilsoniana (3)
R6	SN(S)ISEF	6	Cephalotaxaceae	Cephalotaxus	C. sinensis(4) ,C. hainanensis(3), C. wilsoniana (3)
R7	IN(D)IQED	6	Cephalotaxaceae	Cephalotaxus	C.sinensis (4), C. hainanensis(5), C. wilsoniana (4)
R8	SCSNISSIS	9	Cephalotaxaceae	Cephalotaxus	C. hainanensis (2)
R9	SDIKEN	6	Cephalotaxaceae	Cephalotaxus	C. wilsoniana (2)
R10	KKKK(R)CYLD	8	Cephalotaxaceae	Cephalotaxus	C. sinensis (2), C. hainanensis (2), C. wilsoniana (2), C. oliveri (2), C.fortune (2)
R11	ENKDS(F)ENIETK	11	Cupressaceae	Cunninghamia	C. lanceolata (3)
R12	MC(Y)EK(E)DKDSEK(E）	10	Cupressaceae	Calocedrus	C. formosana (4)
R13	EDRFNSTEEENETESV	16	Cupressaceae	Taiwania	T. cryptomerioides(2)， T. flousiana (2)
R14	VEDTSFF	7	Cupressaceae	Juniperus	J. virginiana (2)
R15	LVEYVKKRDFYQCDNIIDAIIYDENIEDNFVE	32	Cupressaceae	Juniperus	J. virginiana (2), J. scopulorum (2), J. bermudiana (2)
R16	KKDCDNNE	8	Cupressaceae	Taiwania	T. cryptomerioides (6), T. flousiana (7)
R17	NNEKECQ	7	Cupressaceae	Cunninghamia	C. lanceolata (4)
R18	KKDCEYCDNNE	11	Cupressaceae	Taiwania	T. cryptomerioides(3), T. flousiana (2)
R19	IEDTED	6	Cupressaceae	Metasequoia,Juniperus	M. glyptostroboides (2), J. virginiana (2), J. scopulorum (2), J. bermudiana (2), J. monosperma (2), C. lanceolata (2), C. formosana (2),
R20	IEEKVE(KD)	6	Taxaceae	Taxus	T. media (3), T. chinensis (4), T. yunnanensis (2), T. wallichiana (3), T. mairei NC020321 (3), T. cuspidate (4,) T.mairei KJ123824 (3)
R21	EYEQKDD	7	Taxaceae	Taxus	T. wallichiana (2)
R22	TNDNNE(Q)NGRP(S)TLKL(I)NGSFRQ(K)	20	Taxaceae	Taxus	T. media (3), T. chinensis (3), T. yunnanensis (4), T. wallichiana(2), T. mairei (2), T.cuspidate (3), T. mairei KJ123824 (4)
R23	IEDI(P)SY(ED)	8	Taxaceae	Taxus,Pseudotaxus	T. media (2), T. chinensis (2), T. yunnanensis (2), T. wallichiana (2), T. mairei (2), P. chienii (2), T. cuspidate (2), T. mairei KJ123824(2)
R24	EEIE	4	Taxaceae	Amentotaxus	A. argotaenia (9), A. formosana (8)
R25	EIEE(Q)DKN(T,I)IDYKK(H)LWI(T)Y(H)CR(K)KCYTFY(S)F(S)KEFLLEEN(-)R(K)T(S)VCTT(N)CGATLK(Q)MTSSEQESGEESGE	59	Taxaceae	Amentotaxus,Torreya	T. fargesii (2), T. grandis (2), A. argotaenia (2), A. formosana (2)
R26	QEIE	4	Taxaceae	Amentotaxus	A. argotaenia (13)， A. formosana (12)
R27	QDIEYPENLM(I,V)	10	Podocarpaceae	Podocarpus	P. macrophyllus (3)， P. neriifolius (3)， P. Lambertii (2)
R28	QDFEYIEKLT	10	Podocarpaceae	Podocarpus,Nageia,Retrophyllum	P. totara (2)，N. fleuryi (2)，N. nagi (2)，R. Piresii (2)，N. nagi NC_023120 (2)
R29	IKSLMEDIEEYLENLMEDESSI	22	Araucariaceae	Araucaria,Agathis	A. dammara (2)， A. cunninghamii (2)
R30	EEEVP	5	Podocarpaceae,Araucariaceae	Podocarpus,Nageia,Retrophyllum,Araucaria,Agathis	P. macrophyllus (2)， P. neriifolius(2)，P. totara (2)， P. Lambertii (2)， R. piresii (2)， N. Fleuryi (2)， N. Nagi (2)， N. nagi NC_023120 (2)， A. dammara (3)， A. cunninghamii (5)
R31	DREEKPD(Y)MDHV(A,G)TV(S)S(H,Y)QIDTS(G)L	20	Araucariaceae	Araucaria,Agathis	A. cunninghamii (8) A. dammara (7)
